# Supplementary material for: A multi-pronged approach to addressing curricular challenges in undergraduate immunology education
Source: Frontiers journal article supplement (doi:10.3389/feduc.2025.1640703), 2025-07-24
Supplement: Data_Sheet_1.pdf [file Data_Sheet_1.pdf]

## "R" framework of immune functions

In all of our courses, we used the "R" framework to emphasize conceptual understanding of the immune system as one that maintains homeostasis in response to internal and external changes. We provide an example list of broad topics from our upper-level immunology survey course within the "R" framework as a guide for other educators who might adapt this framework into various other immunology courses.

**Recognition** - How do cells recognize strangers, danger, and death? Detection of intracellular and extracellular perturbations and consequent signaling cascades.

**Response** - Immediate inflammatory tissue responses, including local mediator release and threat neutralization by tissue resident immune cells and structural tissue cells.

**Recruitment** - Cytokine and chemokine-based recruitment of neutrophils, macrophages for rapid containment and clearance; alerting T cells and B cells for slower antigen-specific responses. T cell and B cell maturation pathways and repertoire development

**Resolution and repair** - Continued focus of immune actions at the site of infiltration, damage, or death; antigen-specific mechanisms as means of focusing and amplifying targeted neutralization and initiating tissue repair.

**Regulation** - Central role of antigen as regulator; once the threat is absent, the immune response is dialed down. What happens when antigens are persistent: chronic infections, self-antigens etc.? Tissue repair and remodeling - restorative and pathological.

**Remembering** - Circulating and tissue-resident memory immune cells - origin, maintenance, recruitment into active response; implications for vaccines, allergies, and autoimmunity.

Supplementary Table 1: Outline of broad weekly topics within the “R” framework

| Week        | Broad lecture topics                                                        | Portions of the “R” framework emphasised                                                                                                                                                                                                                                              |
|-------------|-----------------------------------------------------------------------------|---------------------------------------------------------------------------------------------------------------------------------------------------------------------------------------------------------------------------------------------------------------------------------------|
| Week 1      | Introductions and course overview;<br>Locating the immune system            | Location of the immune system: All cells act as pattern recognition machines in homeostatic systems                                                                                                                                                                                   |
| Week 2      | Multicellular organisms and immune specialization; Hematopoiesis            | Immune responses in single-celled, opportunistic multicellular ( <i>D. discoideum</i> ), and multicellular - plants, invertebrate, and vertebrate/jawed organisms; Hematopoiesis - specialized immune cells and their mostly common origin in hematopoietic stem cells in vertebrates |
| Week 3      | Pattern recognition and an innate sense of “danger”                         | Recognition and Response                                                                                                                                                                                                                                                              |
| Week 4      | V(D)J recombination and B cell development                                  | Recruitment and Response                                                                                                                                                                                                                                                              |
| Week 5      | Know thyself: T cell development and selection                              | Recruitment and Response                                                                                                                                                                                                                                                              |
| Weeks 6-8   | The arc of an immune response: Integration of innate and adaptive responses | Recognition, Response, Recruitment and Resolution                                                                                                                                                                                                                                     |
| Week 9      | Harnessing the immune system: Vaccine and immune memory                     | Remembering                                                                                                                                                                                                                                                                           |
| Week 10     | Harnessing the immune system: Cancer immunology and immunotherapy           | Entire R framework applies                                                                                                                                                                                                                                                            |
| Week 11     | Allergies and responses to parasites                                        | Entire R framework applies                                                                                                                                                                                                                                                            |
| Weeks 12-13 | Autoimmunity and autoinflammation                                           | Entire R framework applies                                                                                                                                                                                                                                                            |
| Week 14     | The other in the self: Transplantation and pregnancy;<br>Immunodeficiencies | Entire R framework applies                                                                                                                                                                                                                                                            |
| Week 15     | Wrap up, final projects and presentation, and final exam                    |                                                                                                                                                                                                                                                                                       |
